# Supplementary material
Source: PubMed Central journal article supplement (PMC3754826)
Supplement: NIHMS494309-supplement-02.pdf [file NIHMS494309-supplement-02.pdf]

**Supplemental Table 2.** Age- and sex-specific prevalence (per 100 population) of the common drug groups 21 through 40 in the 2009 Olmsted County, MN, population (N= 142,377)

| Drug group                                                | Age (y) <sup>a</sup> |      |       |      |       |      |       |       |       |       | All ages           |      |                                |
|-----------------------------------------------------------|----------------------|------|-------|------|-------|------|-------|-------|-------|-------|--------------------|------|--------------------------------|
|                                                           | 0-18                 |      | 19-29 |      | 30-49 |      | 50-64 |       | 65+   |       | Crude <sup>b</sup> |      | Standardized <sup>c</sup><br>% |
|                                                           | No.                  | %    | No.   | %    | No.   | %    | No.   | %     | No.   | %     | No.                | %    |                                |
| <b>Genitourinary agents</b>                               |                      |      |       |      |       |      |       |       |       |       |                    |      |                                |
| Both sexes                                                | 223                  | 0.58 | 688   | 2.87 | 1,538 | 4.06 | 2,631 | 10.70 | 1,953 | 11.27 | 7,033              | 4.94 | 4.76                           |
| Men (boys)                                                | 51                   | 0.26 | 68    | 0.66 | 590   | 3.30 | 1,250 | 10.87 | 868   | 11.52 | 2,827              | 4.23 | 4.22                           |
| Women (girls)                                             | 172                  | 0.91 | 620   | 4.55 | 948   | 4.73 | 1,381 | 10.55 | 1,085 | 11.07 | 4,206              | 5.57 | 5.32                           |
| <b>Thyroid modifiers</b>                                  |                      |      |       |      |       |      |       |       |       |       |                    |      |                                |
| Both sexes                                                | 94                   | 0.24 | 346   | 1.44 | 1,792 | 4.72 | 2,132 | 8.67  | 2,180 | 12.57 | 6,544              | 4.60 | 4.52                           |
| Men (boys)                                                | 31                   | 0.16 | 52    | 0.50 | 325   | 1.82 | 419   | 3.64  | 499   | 6.62  | 1,326              | 1.98 | 2.04                           |
| Women (girls)                                             | 63                   | 0.33 | 294   | 2.16 | 1,467 | 7.32 | 1,713 | 13.08 | 1,681 | 17.15 | 5,218              | 6.91 | 6.72                           |
| <b>Non-opioid analgesics</b>                              |                      |      |       |      |       |      |       |       |       |       |                    |      |                                |
| Both sexes                                                | 573                  | 1.49 | 513   | 2.14 | 1,451 | 3.83 | 1,638 | 6.66  | 2,076 | 11.98 | 6,251              | 4.39 | 4.36                           |
| Men (boys)                                                | 296                  | 1.51 | 169   | 1.63 | 560   | 3.13 | 643   | 5.59  | 735   | 9.76  | 2,403              | 3.59 | 3.66                           |
| Women (girls)                                             | 277                  | 1.46 | 344   | 2.52 | 891   | 4.45 | 995   | 7.60  | 1,341 | 13.68 | 3,848              | 5.10 | 4.96                           |
| <b>Ophthalmic anti-infective/anti-inflammatory agents</b> |                      |      |       |      |       |      |       |       |       |       |                    |      |                                |
| Both sexes                                                | 2,116                | 5.49 | 607   | 2.53 | 1,096 | 2.89 | 851   | 3.46  | 1,331 | 7.68  | 6,001              | 4.21 | 4.20                           |
| Men (boys)                                                | 1,069                | 5.45 | 199   | 1.93 | 463   | 2.59 | 346   | 3.01  | 540   | 7.17  | 2,617              | 3.91 | 3.90                           |
| Women (girls)                                             | 1,047                | 5.53 | 408   | 2.99 | 633   | 3.16 | 505   | 3.86  | 791   | 8.07  | 3,384              | 4.48 | 4.49                           |

**Supplemental Table 2. Continued**

| Drug group                                    | Age (y) <sup>a</sup> |      |       |      |       |      |       |      |       |       | All ages           |      |                           |
|-----------------------------------------------|----------------------|------|-------|------|-------|------|-------|------|-------|-------|--------------------|------|---------------------------|
|                                               | 0-18                 |      | 19-29 |      | 30-49 |      | 50-64 |      | 65+   |       | Crude <sup>b</sup> |      | Standardized <sup>c</sup> |
|                                               | No.                  | %    | No.   | %    | No.   | %    | No.   | %    | No.   | %     | No.                | %    |                           |
| <b>Antitussives/expectorants</b>              |                      |      |       |      |       |      |       |      |       |       |                    |      |                           |
| Both sexes                                    | 455                  | 1.18 | 870   | 3.63 | 2,013 | 5.31 | 1,456 | 5.92 | 1,024 | 5.91  | 5,818              | 4.09 | 4.04                      |
| Men (boys)                                    | 197                  | 1.00 | 216   | 2.09 | 657   | 3.67 | 485   | 4.22 | 397   | 5.27  | 1,952              | 2.92 | 2.99                      |
| Women (girls)                                 | 258                  | 1.36 | 654   | 4.80 | 1,356 | 6.77 | 971   | 7.42 | 627   | 6.40  | 3,866              | 5.12 | 5.05                      |
| <b>Sulfonamide and related antimicrobials</b> |                      |      |       |      |       |      |       |      |       |       |                    |      |                           |
| Both sexes                                    | 893                  | 2.32 | 971   | 4.05 | 1,543 | 4.07 | 1,055 | 4.29 | 990   | 5.71  | 5,452              | 3.83 | 3.74                      |
| Men (boys)                                    | 228                  | 1.16 | 141   | 1.36 | 300   | 1.68 | 270   | 2.35 | 274   | 3.64  | 1,213              | 1.81 | 1.83                      |
| Women (girls)                                 | 665                  | 3.51 | 830   | 6.09 | 1,243 | 6.20 | 785   | 6.00 | 716   | 7.30  | 4,239              | 5.61 | 5.56                      |
| <b>Antivirals</b>                             |                      |      |       |      |       |      |       |      |       |       |                    |      |                           |
| Both sexes                                    | 1,456                | 3.78 | 857   | 3.58 | 1,640 | 4.32 | 995   | 4.05 | 467   | 2.69  | 5,415              | 3.80 | 3.76                      |
| Men (boys)                                    | 774                  | 3.95 | 184   | 1.78 | 519   | 2.90 | 322   | 2.80 | 183   | 2.43  | 1,982              | 2.96 | 2.94                      |
| Women (girls)                                 | 682                  | 3.60 | 673   | 4.94 | 1,121 | 5.59 | 673   | 5.14 | 284   | 2.90  | 3,433              | 4.55 | 4.55                      |
| <b>Blood glucose regulation agents</b>        |                      |      |       |      |       |      |       |      |       |       |                    |      |                           |
| Both sexes                                    | 98                   | 0.25 | 231   | 0.96 | 1,068 | 2.82 | 1,843 | 7.50 | 2,016 | 11.63 | 5,256              | 3.69 | 3.63                      |
| Men (boys)                                    | 51                   | 0.26 | 78    | 0.75 | 529   | 2.96 | 995   | 8.66 | 1,036 | 13.75 | 2,689              | 4.02 | 4.08                      |
| Women (girls)                                 | 47                   | 0.25 | 153   | 1.12 | 539   | 2.69 | 848   | 6.48 | 980   | 10.00 | 2,567              | 3.40 | 3.26                      |

**Supplemental Table 2. Continued**

| Drug group                    | Age (y) <sup>a</sup> |      |       |      |       |      |       |      |       |       | All ages           |      |                           |
|-------------------------------|----------------------|------|-------|------|-------|------|-------|------|-------|-------|--------------------|------|---------------------------|
|                               | 0-18                 |      | 19-29 |      | 30-49 |      | 50-64 |      | 65+   |       | Crude <sup>b</sup> |      | Standardized <sup>c</sup> |
|                               | No.                  | %    | No.   | %    | No.   | %    | No.   | %    | No.   | %     | No.                | %    |                           |
| <b>Anti-acne agents</b>       |                      |      |       |      |       |      |       |      |       |       |                    |      |                           |
| Both sexes                    | 1,598                | 4.14 | 1,270 | 5.30 | 1,216 | 3.21 | 691   | 2.81 | 323   | 1.86  | 5,098              | 3.58 | 3.47                      |
| Men (boys)                    | 718                  | 3.66 | 304   | 2.94 | 214   | 1.20 | 157   | 1.37 | 127   | 1.69  | 1,520              | 2.27 | 2.21                      |
| Women (girls)                 | 880                  | 4.64 | 966   | 7.09 | 1,002 | 5.00 | 534   | 4.08 | 196   | 2.00  | 3,578              | 4.74 | 4.71                      |
| <b>Anticonvulsants</b>        |                      |      |       |      |       |      |       |      |       |       |                    |      |                           |
| Both sexes                    | 333                  | 0.86 | 580   | 2.42 | 1,607 | 4.24 | 1,328 | 5.40 | 1,101 | 6.35  | 4,949              | 3.48 | 3.46                      |
| Men (boys)                    | 170                  | 0.87 | 192   | 1.86 | 614   | 3.43 | 522   | 4.54 | 453   | 6.01  | 1,951              | 2.92 | 2.98                      |
| Women (girls)                 | 163                  | 0.86 | 388   | 2.85 | 993   | 4.96 | 806   | 6.16 | 648   | 6.61  | 2,998              | 3.97 | 3.91                      |
| <b>Anti-infectives, other</b> |                      |      |       |      |       |      |       |      |       |       |                    |      |                           |
| Both sexes                    | 478                  | 1.24 | 996   | 4.16 | 1,279 | 3.37 | 1,011 | 4.11 | 1,087 | 6.27  | 4,851              | 3.41 | 3.30                      |
| Men (boys)                    | 167                  | 0.85 | 142   | 1.37 | 321   | 1.79 | 397   | 3.45 | 449   | 5.96  | 1,476              | 2.21 | 2.24                      |
| Women (girls)                 | 311                  | 1.64 | 854   | 6.27 | 958   | 4.78 | 614   | 4.69 | 638   | 6.51  | 3,375              | 4.47 | 4.35                      |
| <b>Hormones, other</b>        |                      |      |       |      |       |      |       |      |       |       |                    |      |                           |
| Both sexes                    | 80                   | 0.21 | 179   | 0.75 | 453   | 1.19 | 1,271 | 5.17 | 2,376 | 13.71 | 4,359              | 3.06 | 3.01                      |
| Men (boys)                    | 59                   | 0.30 | 31    | 0.30 | 149   | 0.83 | 267   | 2.32 | 574   | 7.62  | 1,080              | 1.62 | 1.67                      |
| Women (girls)                 | 21                   | 0.11 | 148   | 1.09 | 304   | 1.52 | 1,004 | 7.67 | 1,802 | 18.38 | 3,279              | 4.34 | 4.08                      |

**Supplemental Table 2. Continued**

| Drug group                                                             | Age (y) <sup>a</sup> |      |       |      |       |      |       |      |       |       | All ages           |      |                           |
|------------------------------------------------------------------------|----------------------|------|-------|------|-------|------|-------|------|-------|-------|--------------------|------|---------------------------|
|                                                                        | 0-18                 |      | 19-29 |      | 30-49 |      | 50-64 |      | 65+   |       | Crude <sup>b</sup> |      | Standardized <sup>c</sup> |
|                                                                        | No.                  | %    | No.   | %    | No.   | %    | No.   | %    | No.   | %     | No.                | %    |                           |
| <b>Calcium channel blockers</b>                                        |                      |      |       |      |       |      |       |      |       |       |                    |      |                           |
| Both sexes                                                             | 26                   | 0.07 | 86    | 0.36 | 455   | 1.20 | 1,066 | 4.34 | 2,430 | 14.02 | 4,063              | 2.85 | 2.83                      |
| Men (boys)                                                             | 12                   | 0.06 | 20    | 0.19 | 204   | 1.14 | 527   | 4.58 | 904   | 12.00 | 1,667              | 2.49 | 2.57                      |
| Women (girls)                                                          | 14                   | 0.07 | 66    | 0.48 | 251   | 1.25 | 539   | 4.12 | 1,526 | 15.57 | 2,396              | 3.17 | 3.02                      |
| <b>Tetracyclines</b>                                                   |                      |      |       |      |       |      |       |      |       |       |                    |      |                           |
| Both sexes                                                             | 612                  | 1.59 | 811   | 3.38 | 1,062 | 2.80 | 618   | 2.51 | 520   | 3.00  | 3,623              | 2.54 | 2.51                      |
| Men (boys)                                                             | 336                  | 1.71 | 270   | 2.61 | 368   | 2.06 | 240   | 2.09 | 258   | 3.42  | 1,472              | 2.20 | 2.22                      |
| Women (girls)                                                          | 276                  | 1.46 | 541   | 3.97 | 694   | 3.46 | 378   | 2.89 | 262   | 2.67  | 2,151              | 2.85 | 2.81                      |
| <b>Skeletal muscle relaxants</b>                                       |                      |      |       |      |       |      |       |      |       |       |                    |      |                           |
| Both sexes                                                             | 51                   | 0.13 | 612   | 2.55 | 1,624 | 4.28 | 905   | 3.68 | 368   | 2.12  | 3,560              | 2.50 | 2.51                      |
| Men (boys)                                                             | 18                   | 0.09 | 208   | 2.01 | 623   | 3.48 | 346   | 3.01 | 121   | 1.61  | 1,316              | 1.97 | 2.04                      |
| Women (girls)                                                          | 33                   | 0.17 | 404   | 2.96 | 1,001 | 5.00 | 559   | 4.27 | 247   | 2.52  | 2,244              | 2.97 | 2.97                      |
| <b>Anticoagulants/antihemorrhagics/platelet aggregation inhibitors</b> |                      |      |       |      |       |      |       |      |       |       |                    |      |                           |
| Both sexes                                                             | 30                   | 0.08 | 82    | 0.34 | 400   | 1.05 | 869   | 3.53 | 1,934 | 11.16 | 3,315              | 2.33 | 2.30                      |
| Men (boys)                                                             | 14                   | 0.07 | 30    | 0.29 | 211   | 1.18 | 539   | 4.69 | 1,020 | 13.54 | 1,814              | 2.71 | 2.80                      |
| Women (girls)                                                          | 16                   | 0.08 | 52    | 0.38 | 189   | 0.94 | 330   | 2.52 | 914   | 9.32  | 1,501              | 1.99 | 1.90                      |

**Supplemental Table 2. Continued**

| Drug group                                      | Age (y) <sup>a</sup> |      |       |      |       |      |       |      |       |      | All ages           |      |                           |
|-------------------------------------------------|----------------------|------|-------|------|-------|------|-------|------|-------|------|--------------------|------|---------------------------|
|                                                 | 0-18                 |      | 19-29 |      | 30-49 |      | 50-64 |      | 65+   |      | Crude <sup>b</sup> |      | Standardized <sup>c</sup> |
|                                                 | No.                  | %    | No.   | %    | No.   | %    | No.   | %    | No.   | %    | No.                | %    |                           |
| <b>Antifungals</b>                              |                      |      |       |      |       |      |       |      |       |      |                    |      |                           |
| Both sexes                                      | 435                  | 1.13 | 679   | 2.83 | 1,208 | 3.19 | 572   | 2.33 | 358   | 2.07 | 3,252              | 2.28 | 2.23                      |
| Men (boys)                                      | 194                  | 0.99 | 64    | 0.62 | 162   | 0.91 | 150   | 1.30 | 116   | 1.54 | 686                | 1.03 | 1.02                      |
| Women (girls)                                   | 241                  | 1.27 | 615   | 4.51 | 1,046 | 5.22 | 422   | 3.22 | 242   | 2.47 | 2,566              | 3.40 | 3.40                      |
| <b>Antidotes, deterrents and poison control</b> |                      |      |       |      |       |      |       |      |       |      |                    |      |                           |
| Both sexes                                      | 48                   | 0.12 | 551   | 2.30 | 1,413 | 3.73 | 910   | 3.70 | 283   | 1.63 | 3,205              | 2.25 | 2.26                      |
| Men (boys)                                      | 26                   | 0.13 | 201   | 1.94 | 655   | 3.66 | 444   | 3.86 | 130   | 1.73 | 1,456              | 2.18 | 2.23                      |
| Women (girls)                                   | 22                   | 0.12 | 350   | 2.57 | 758   | 3.78 | 466   | 3.56 | 153   | 1.56 | 1,749              | 2.32 | 2.30                      |
| <b>Central nervous system agents, other</b>     |                      |      |       |      |       |      |       |      |       |      |                    |      |                           |
| Both sexes                                      | 155                  | 0.40 | 203   | 0.85 | 718   | 1.89 | 833   | 3.39 | 1,249 | 7.20 | 3,158              | 2.22 | 2.20                      |
| Men (boys)                                      | 93                   | 0.47 | 68    | 0.66 | 263   | 1.47 | 281   | 2.44 | 481   | 6.39 | 1,186              | 1.77 | 1.83                      |
| Women (girls)                                   | 62                   | 0.33 | 135   | 0.99 | 455   | 2.27 | 552   | 4.22 | 768   | 7.83 | 1,972              | 2.61 | 2.53                      |
| <b>Dermatological agents, other</b>             |                      |      |       |      |       |      |       |      |       |      |                    |      |                           |
| Both sexes                                      | 515                  | 1.34 | 419   | 1.75 | 878   | 2.31 | 633   | 2.57 | 580   | 3.35 | 3,025              | 2.12 | 2.10                      |
| Men (boys)                                      | 235                  | 1.20 | 107   | 1.04 | 272   | 1.52 | 210   | 1.83 | 225   | 2.99 | 1,049              | 1.57 | 1.59                      |
| Women (girls)                                   | 280                  | 1.48 | 312   | 2.29 | 606   | 3.02 | 423   | 3.23 | 355   | 3.62 | 1,976              | 2.62 | 2.60                      |

## Supplemental Table 2. Continued

<sup>a</sup>Numbers indicate the actual number of cases observed. Prevalence can be computed by dividing the number of cases by the corresponding denominator listed below (and multiplying by 100)

Denominators for men (boys) and women (girls) combined: 0-18=38,558; 19-29=23,968; 30-49=37,927; 50-64=24,588; 65+=17,336

Denominators for men (boys): 0-18=19,611; 19-29=10,337; 30-49=17,888; 50-64=11,496; 65+=7533

Denominators for women (girls): 0-18=18,947; 19-29=13,631; 30-49=20,039; 50-64=13,092; 65+=9803

<sup>b</sup>A crude prevalence was computed by dividing cases observed across all ages by the total population

<sup>c</sup>Overall prevalence for men (boys) and women (girls) combined was standardized by age and sex; overall prevalence for men (boys) and women (girls) separately was standardized only by age (direct standardization using the 2000 US census population)
